# Supplementary material
Source: PubMed Central journal article supplement (PMC6645817)
Supplement: ao7b01752_si_001.pdf [file ao7b01752_si_001.pdf]

# Supporting Information

## Biomimetic Synthesis of Polydopamine Coated ZnFe<sub>2</sub>O<sub>4</sub> Composites as Anode Materials for Lithium-Ion Batteries

Hongyun Yue<sup>†,‡,§</sup>, Ting Du<sup>†,§</sup>, Qiuxian Wang<sup>‡,§</sup>, Zhenpu Shi<sup>†,§</sup>, Hongyu Dong<sup>†,‡,§</sup>,  
Zhaoxia Cao<sup>†,‡,§</sup>, Yun Qiao<sup>†,‡,§</sup>, Yanhong Yin<sup>†,‡,§</sup>, Ruimin Xing<sup>†\*</sup> and Shuting  
Yang<sup>†,‡,§\*</sup>

*†School of Chemistry and Chemical Engineering, Henan Normal University,  
Xinxiang, Henan 453007, P. R. China.*

*‡Henan Key Laboratory of Polyoxometalate Chemistry, Institute of Molecular and  
Crystal Engineering, College of Chemistry and Chemical Engineering, Henan  
University, Kaifeng, P. R. China.*

*‡Henan Battery Research Institute, Collaborative Innovation Center of Henan  
Province for Motive Power and Key Materials, Xinxiang, 453007, P. R. China*

*§National and Local Joint Engineering Laboratory of Motive Power and Key  
Materials, Xinxiang, Henan 453007, P. R. China.*



## **Figures:**

**Figure S1** XRD patterns of ZFDA2, ZFDA3, and ZFDA4.

**Figure S2** FESEM images of ZFDA2 (a and b), ZFDA3 (c and d) and ZFDA4 (e and f).

**Figure S3** Cycling performances of ZFDA2, ZFDA3, and ZFDA4 electrodes at the current density of  $1 \text{ A g}^{-1}$  (a) and rate capability of ZFDA2, ZFDA3, and ZFDA4 electrodes (b).

Figure S1.

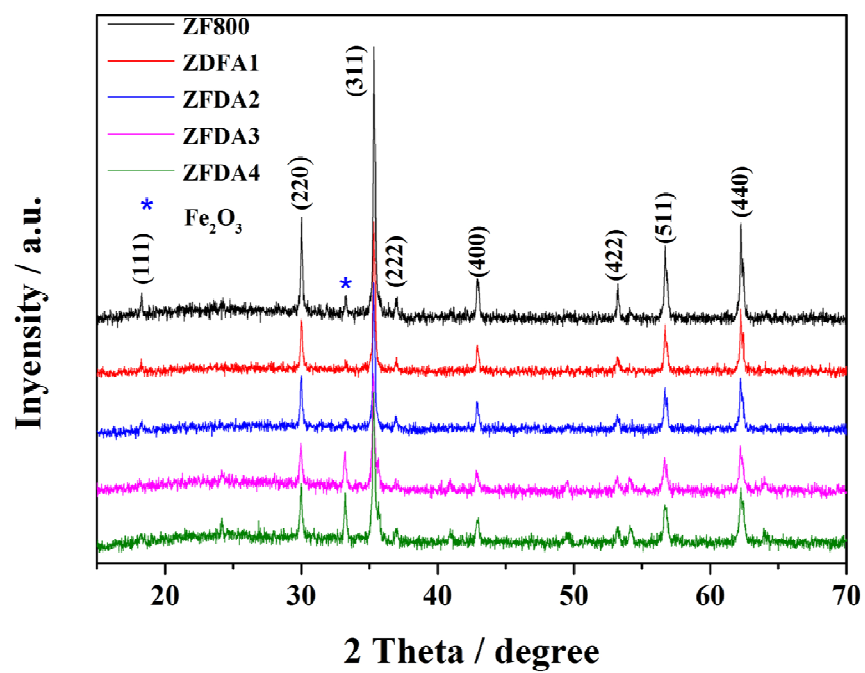

Figure S1 XRD patterns of ZFDA2, ZFDA3, and ZFDA4.

**Figure S2.**

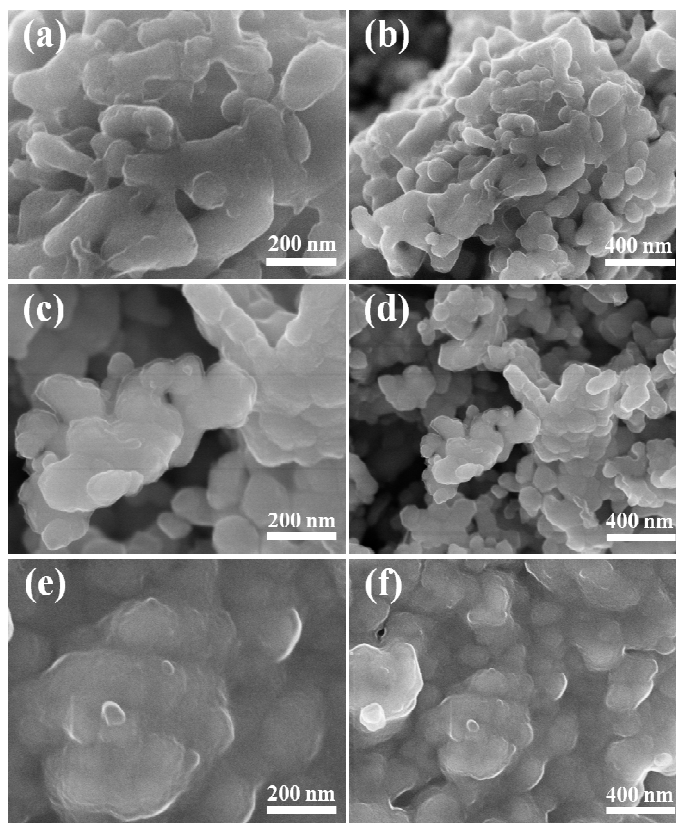

**Figure S2** FESEM images of ZFDA2 (a and b), ZFDA3 (c and d) and ZFDA4 (e and f).

**Figure S3.**

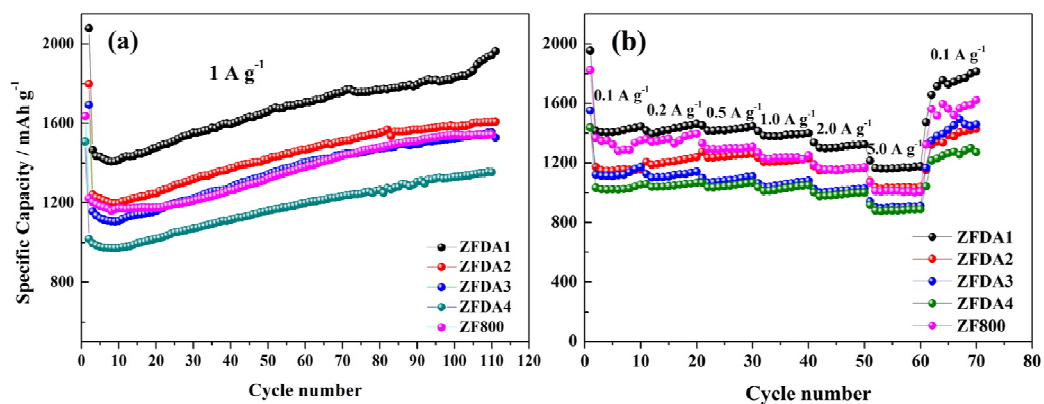

**Figure S3** Cycling performances of ZFDA2, ZFDA3, and ZFDA4 electrodes at the current density of 1 A g<sup>-1</sup> (a) and rate capability of ZFDA2, ZFDA3, and ZFDA4 electrodes (b).
